# Supplementary material
Source: Springer Nature journal article supplement (https://www.springermedizin.de/resource/supplementary/12888_2008_522_MOESM3_ESM.pdf/9483498)

**Weight Change (kg) at Week 30**

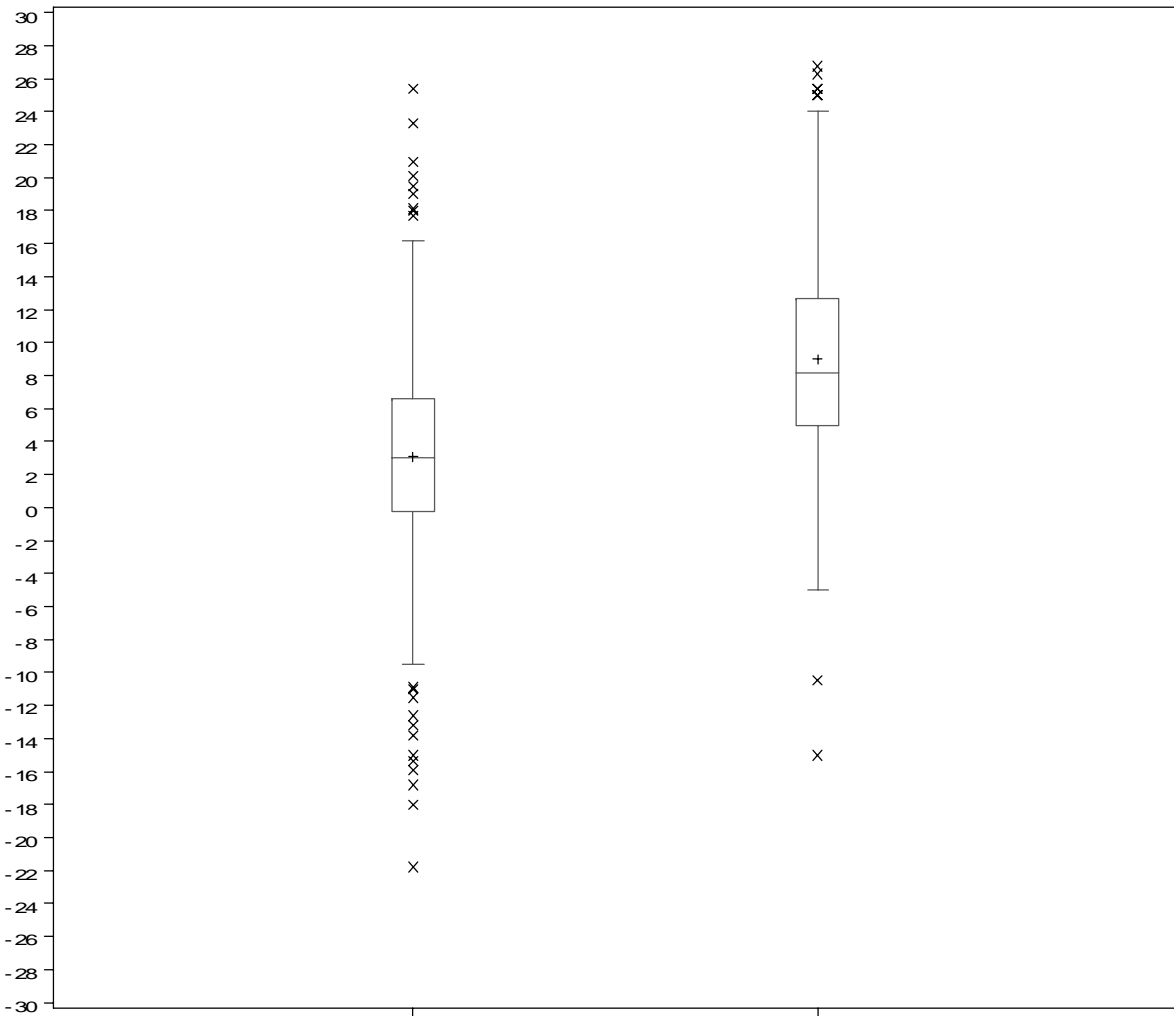

**Patients who gained <2kg by Week 3**

**Patients who gained ≥2kg by Week 3**

Supplement: MOESM3 [file 9483498]
